# Supplementary material for: Insulation board-derived N/O self-doped porous carbon as an electrode material for high-performance symmetric supercapacitors
Source: Royal Society of Chemistry journal article supplement (doi:10.1039/d1nj03157k), 2021-01-01
Supplement: d1nj03157k1.pdf [file d1nj03157k1.pdf]

## Supporting Information

### **Insulation board-derived N/O self-doped porous carbon as electrode materials for high-performance symmetric supercapacitor**

Yingjie Su<sup>#</sup>, Zhenjie Lu<sup>#</sup>, Junxia Cheng, Xuefei Zhao, Xingxing Chen<sup>\*</sup>, Lijuan Gao<sup>\*</sup>

*School of Chemical Engineering, University of Science and Technology Liaoning,  
Qianshan Middle Road 185, 114051 Anshan, China*

*<sup>#</sup> The two authors contributed equally.*

*<sup>\*</sup> Corresponding authors. E-mail: gaolijuan@ustl.edu.cn, xingchenstar79@163.com*

*(X. X. Chen).*

## Experimental

In a three-electrode system, the specific capacitance ( $C$ ,  $F g^{-1}$ ) obtained from the galvanostatic charging/discharging (GCD) curves was calculated according to the formula:

$$C = (I\Delta t) / (m\Delta V),$$

where  $I$ ,  $\Delta t$ ,  $m$  and  $\Delta V$  represent discharge current (A), discharge time (s), electrode mass (g) and discharge voltage (V), respectively [1].

For the symmetrical supercapacitor, the specific capacitance ( $C_s$ ,  $F g^{-1}$ ) calculated from the GCD curves was according to formula:

$$C_s = (2I\Delta t) / (m\Delta V),$$

where  $I$ ,  $\Delta t$ ,  $m$  and  $\Delta V$  represent discharge current (A), discharge time (s), electrode mass (g) and cell-operation discharge voltage (V), respectively [2].

The energy density ( $E$ ,  $Wh kg^{-1}$ ) and power density ( $P$ ,  $W kg^{-1}$ ) were respectively calculated with the equations of  $E = 0.5C_s V^2 / 3.6$  and  $P = 3600E / \Delta t$  [3,4].

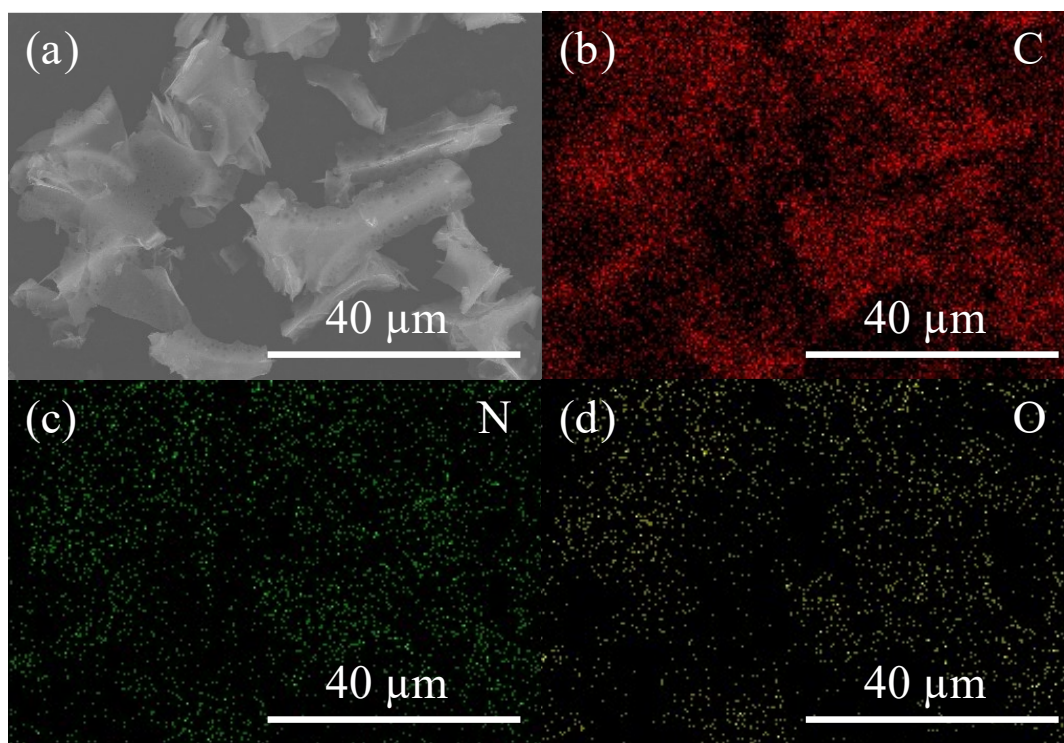

**Figure S1** (a) SEM image of PC-600 and its corresponding elemental mappings of (b) C, (c) N, and (d) O.

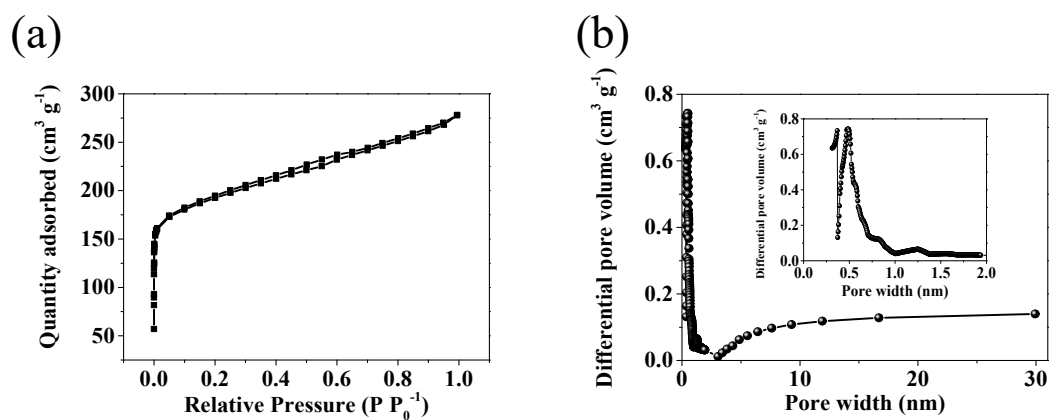

**Figure S2** (a)  $N_2$  adsorption-desorption isotherms, (b) and (inset) pore size distribution curves of CC.

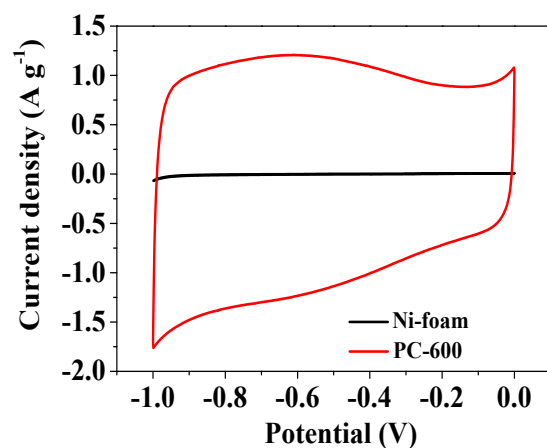

**Figure S3** The comparison of CV curves of pure Ni-foam and PC-600 loaded on Ni-foam

(Scan rate:  $5 \text{ mV s}^{-1}$ ).

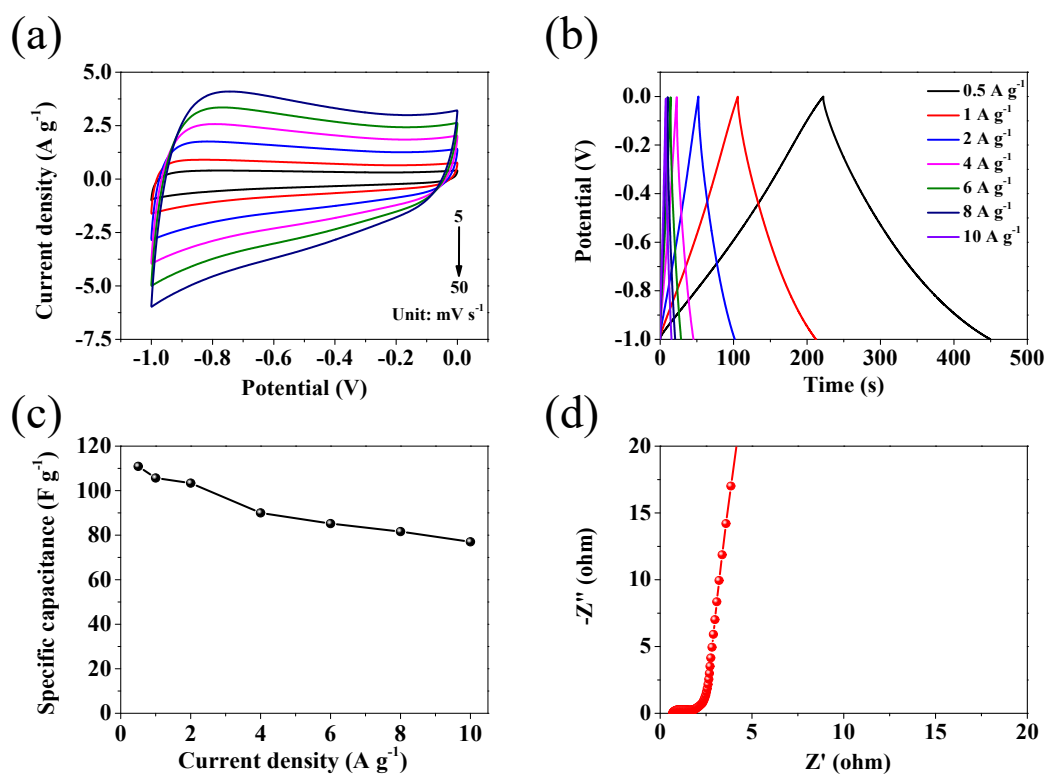

**Figure S4** (a) CV, (b) GCD, (c) specific capacitance at different current densities and (d)

EIS curves of CC.

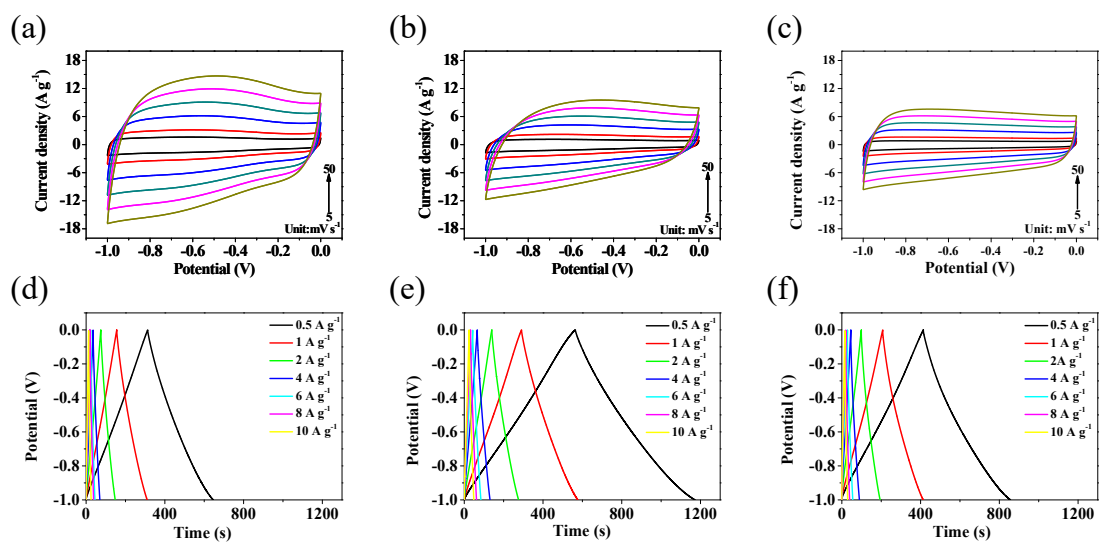

**Figure S5** (a~c) CV curves at different scan rates and GCD curves at different current densities of PC-500, PC-700 and PC-800.

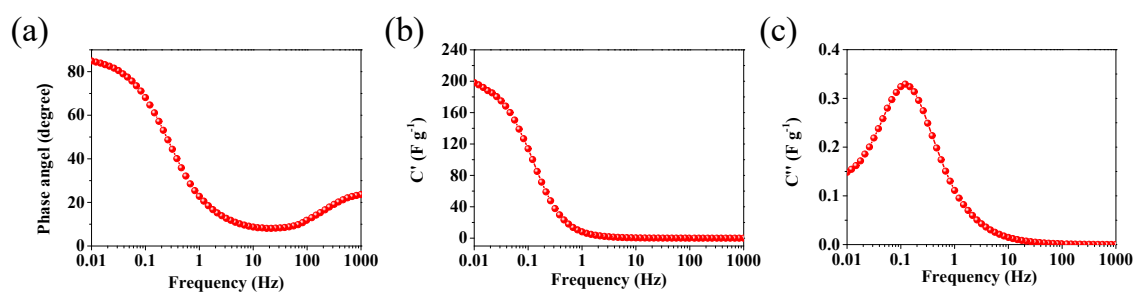

**Figure S6** (a) Bode plot, (b) real and (c) imaginary parts of specific capacitance fitted by EIS.

**Table S1** Nitrogen adsorption-desorption measurements at 77 k for CC, PC-500, PC-600, PC-700 and PC-800.

| Sample | $S_{\text{BET}}$<br>( $\text{m}^2 \text{g}^{-1}$ ) | $V_{\text{tot}}$<br>( $\text{cm}^3 \text{g}^{-1}$ ) | $V_{\text{mic}}$<br>( $\text{cm}^3 \text{g}^{-1}$ ) | $V_{\text{meso}}$<br>( $\text{cm}^3 \text{g}^{-1}$ ) | $D_{\text{pore}}$<br>(nm) |
|--------|----------------------------------------------------|-----------------------------------------------------|-----------------------------------------------------|------------------------------------------------------|---------------------------|
| CC     | 98                                                 | 0.430                                               | 0.289                                               | 0.156                                                | 1.38                      |
| PC-500 | 145                                                | 0.134                                               | 0.062                                               | 0.091                                                | 3.68                      |
| PC-600 | 960                                                | 0.413                                               | 0.368                                               | 0.059                                                | 1.72                      |
| PC-700 | 1383                                               | 0.605                                               | 0.532                                               | 0.097                                                | 1.74                      |
| PC-800 | 1395                                               | 0.648                                               | 0.540                                               | 0.141                                                | 1.86                      |

**Table S2** The relative concentrations of nitrogen and oxygen estimated from XPS in PC-500, PC-600, PC-700 and PC-800.

| Sample | O 1s  |       |       |       | N 1s  |       |       |       |       |
|--------|-------|-------|-------|-------|-------|-------|-------|-------|-------|
|        | Total | O-C=O | C=O   | C-O-H | Total | N-O   | N-Q   | N-5   | N-6   |
|        | O %   | %     | %     | %     | N %   | %     | %     | %     | %     |
| PC-500 | 11.43 | 9.62  | 78.57 | 11.81 | 1.84  | 20.27 | 31.28 | 25.95 | 22.50 |
| PC-600 | 12.96 | 3.43  | 28.87 | 67.70 | 1.61  | 17.97 | 39.00 | 26.88 | 16.15 |
| PC-700 | 13.22 | 10.40 | 76.01 | 13.59 | 0.93  | 23.61 | 27.17 | 26.74 | 22.48 |
| PC-800 | 12.05 | 61.58 | 31.82 | 6.60  | 0.83  | 21.56 | 24.55 | 28.12 | 25.77 |

**Table S3** The comparison of electrochemical performance of the supercapacitors using waste material-derived porous carbon as the electrodes.

| Sample     | Specific Capacitance (F g <sup>-1</sup> ) | Power Density (W kg <sup>-1</sup> ) | Energy Density (Wh kg <sup>-1</sup> ) | Stability          | Ref.      |
|------------|-------------------------------------------|-------------------------------------|---------------------------------------|--------------------|-----------|
| PC-600     | 262.2                                     | 500                                 | 17.4                                  | 100%<br>(20000 c)  | This work |
| QPC-3      | 254                                       | 100                                 | 9.5                                   | 93%<br>(10000 c)   | [5]       |
| U-3DHPC    | 284.1                                     | 200.7                               | 19.2                                  | 86.5%<br>(10000 c) | [6]       |
| HPCR-800   | 48.7                                      | 100                                 | 6.77                                  | 81%<br>(10000 c)   | [7]       |
| TC-1       | 356.4                                     | 300                                 | 10.4                                  | 92.8%<br>(5000 c)  | [8]       |
| HPC-4      | 452.7                                     | 140                                 | 14.1                                  | 90%<br>(6000 c)    | [9]       |
| WB-HPC-700 | 413                                       | 220.9                               | 22.3                                  | 93%<br>(10000 c)   | [10]      |

## Reference

- [1] C. Ma, L.Q. Wu, M. Dirican, H. Cheng, J.J. Li, Y. Song, J.L. Shi, X.W. Zhang, Carbon black-based porous sub-micron carbon fibers for flexible supercapacitors, *Appl. Surf. Sci.* 537 (2021) 147914.
- [2] Y.B. Liu, G.X. Huang, Y.Y. Yuan, Y.H. Yao, Q.R. Liu, B.L. Xing, J.B. Jia, C.X. Zhang, Structural evolution of porous graphitic carbon nanosheets based on quinonyl decomposition for supercapacitor electrodes, *Appl. Surf. Sci.* 573 (2021) 147824.
- [3] J.Q. Cui, J. Yin, J.S. Meng, Y. Liu, M.Y. Liao, T. Wu, M. Dresselhaus, Y.M. Xie, J.H. Wu, C.Z. Lu, X.C. Zhang, Supermolecule cucurbituril subnanoporous carbon supercapacitor (SCSCS), *Nano Lett.* 21 (2021) 2156 – 2164.
- [4] Y.Y. Tan, D.L. Wu, T. Wang, P.G. Liu, J. Guo, D.Z. Jia, Facile synthesis of functionalized graphene hydrogel for high performance supercapacitor with high volumetric capacitance and ultralong cycling stability, *Appl. Surf. Sci.* 455 (2018) 683–695.
- [5] Y. Sun, J. J. Xue, S.Y. Dong, Y.D. Zhang, Y.F. An, B. Ding, T.F. Zhang, H. Dou, X.G. Zhang, Biomass-derived porous carbon electrodes for high-performance supercapacitors, *J. Mater. Sci.* 55, (2020) 5166–5176.
- [6] C.D. Ma, J.K. Min, J. Gong, X.G. Liu, X.Y. Mu, X.C. Chen, T. Tang, Transforming polystyrene waste into 3D hierarchically porous carbon for highperformance supercapacitors, 253 (2020) 126775.



- [7] L. Fang, Y.P. Xie, Y.Y. Wang, Z.W. Zhang, P.F. Liu, N. Cheng, J.F. Liu, Y.C. Tu, H.B. Zhao, J.J. Zhang, Facile synthesis of hierarchical porous carbon nanorods for supercapacitors application, *Appl. Surf. Sci.* 464 (2019) 479–487.
- [8] Z.R. Huang, C.Y. Qin, J. Wang, L. Cao, Z.W. Ma, Q.H. Yuan, Z.D. Lin, P. Zhang, Research on high-value utilization of carbon derived from tobacco waste in supercapacitors, *Materials* 14 (2021) 1714–1726.
- [9] G.Z. Zhao, Y.J. Li, G. Zhu, J.Y. Shi, T. Lu, L.K. Pan, Waste fruit grain orange-derived 3D hierarchically porous carbon for high-performance all-solid-state supercapacitor, *Ionics* 25 (2019) 3935–3944.
- [10] P.F. Yu, Y.R. Liang, H.W. Dong, H. Hu, S.M. Liu, L. Peng, M.T. Zheng, Y. Xiao, Y.L. Liu, Rational synthesis of highly porous carbon from waste bagasse for advanced supercapacitor application, *ACS Sustainable Chem. Eng.* 6 (2018) 15325–15332.
